# Supplementary material
Source: PubMed Central journal article supplement (PMC4516910)
Supplement: Supp_Table1.pdf [file Supp_Table1.pdf]

## Supplementary Data

SUPPLEMENTARY TABLE S1. FORWARD AND REVERSE PRIMERS FOR AMPLIFICATION OF SPECIFIC TARGET GENES AND GENE TARGET SIZES AFTER POLYMERASE CHAIN REACTION (PCR) AMPLIFICATION WITH SPECIFIC OLIGONUCLEOTIDE PRIMERS<sup>a</sup>

| <i>Gene</i> | <i>Sequence</i>                                                  | <i>PCR size</i> | <i>Gene localization</i> | <i>Pathotype</i> | <i>Reference</i>                     |
|-------------|------------------------------------------------------------------|-----------------|--------------------------|------------------|--------------------------------------|
| <i>eae</i>  | CTGAACGGCGATTACGCGAA<br>CGAGACGATACGATCCAG                       | 917             | Chromosome               | STEC,<br>EPEC    | Gómez-Duarte<br><i>et al.</i> , 2010 |
| <i>bfpA</i> | AATGGTGCTTGCGCTTGCTGC<br>GCCGCTTTATCCAACCTGGTA                   | 326             | Plasmid                  | EPEC             | Gómez-Duarte<br><i>et al.</i> , 2010 |
| <i>aggR</i> | GTATACACAAAAGAAGGAAGC<br>ACAGAATCGTCAGCATCAGC                    | 254             | Plasmid                  | EAEC             | Gómez-Duarte<br><i>et al.</i> , 2010 |
| <i>LT</i>   | GCA CAC GGA GCT CCT CAG TC TCC<br>TTC ATC CTT TCA ATG GCT TT     | 218             | Plasmid                  | ETEC             | Gómez-Duarte<br><i>et al.</i> , 2010 |
| <i>ST</i>   | AAA GGA GAG CTT CGT CAC ATT TT<br>AAT GTC CGT CTT GCG TTA GGA C  | 147             | Plasmid                  | ETEC             | Gómez-Duarte<br><i>et al.</i> , 2010 |
| <i>daaE</i> | GAA CGT TGG TTA ATG TGG GGT AA<br>TAT TCA CCG GTC GGT TAT CAG T  | 542             | Chromosome               | DAEC             | Gómez-Duarte<br><i>et al.</i> , 2010 |
| <i>virF</i> | AGC TCA GGC AAT GAA ACT TTG AC<br>TGG GCT TGA TAT TCC GAT AAG TC | 618             | Plasmid                  | EIEC             | Gómez-Duarte<br><i>et al.</i> , 2010 |
| <i>ipaH</i> | CTC GGC ACG TTT TAA TAG TCT GG GTG<br>GAG AGC TGA AGT TTC TCT GC | 933             | Plasmid                  | EIEC             | Gómez-Duarte<br><i>et al.</i> , 2010 |
| <i>stx1</i> | ACACTGGATGATCTCAGTGG<br>CTGAATCCCCCTCCATTATG                     | 614             | Chromosome               | STEC             | Gannon <i>et al.</i> , 1997          |
| <i>stx2</i> | ATC CTA TTC CCG GGA GTT TAC GGCG<br>TCA TCG TAT ACA CAG GAG C    | 584             | Chromosome               | STEC             | Gómez-Duarte<br><i>et al.</i> , 2010 |

<sup>a</sup>First sequence in front of gene target is the forward primer. The line below corresponds to the reverse primer.

DAEC, diffusely adherent *Escherichia coli*; EAEC, enteroaggregative *E. coli*; EIEC, enteroinvasive *E. coli*; EPEC, enteropathogenic *E. coli*; ETEC, enterotoxigenic *E. coli*; STEC, Shiga toxin-producing *E. coli*.
