# Supplementary material
Source: PubMed Central journal article supplement (PMC4516910)
Supplement: Supp_Table2.pdf [file Supp_Table2.pdf]

SUPPLEMENTARY TABLE S2. FOOD PRODUCT CONTAMINATION WITH COLIFORMS BY SITE OF COLLECTION

| <i>Food product</i> | <i>Store 1</i> |          | <i>Store 2</i> |          | <i>Store 3</i> |          | <i>Store 4</i> |          | <i>Total<sup>a</sup></i> |          |
|---------------------|----------------|----------|----------------|----------|----------------|----------|----------------|----------|--------------------------|----------|
|                     | <i>No.</i>     | <i>%</i> | <i>No.</i>     | <i>%</i> | <i>No.</i>     | <i>%</i> | <i>No.</i>     | <i>%</i> | <i>No.</i>               | <i>%</i> |
| Cheese              | 19 (19)        | 100      | 19 (19)        | 100      | 19 (19)        | 100      | 19 (19)        | 100      | 76 (76)                  | 100      |
| Pasteurized milk    | 13 (19)        | 68.4     | 8 (19)         | 42.1     | 7 (19)         | 36.8     | 9 (19)         | 47.3     | 37 (76)                  | 48.7     |
| Unpasteurized juice | 19 (19)        | 100      | 15 (19)        | 78.9     | 18 (19)        | 94.7     | 17 (19)        | 89.5     | 69 (76)                  | 90.8     |
| Ground beef         | 19 (19)        | 100      | 19 (19)        | 100      | 19 (19)        | 100      | 19 (19)        | 100      | 76 (76)                  | 100      |
| Vegetable           | 19 (19)        | 100      | 19 (19)        | 100      | 19 (19)        | 100      | 19 (19)        | 100      | 76 (76)                  | 100      |
| Total               | 89 (95)        | 93.6     | 80 (95)        | 84.2     | 82 (95)        | 86.3     | 83 (95)        | 87.3     | 334 (380)                | 87.8     |

<sup>a</sup>The difference in the number of contaminated samples among different stores was not statistically significant.

No.: Number of samples positive for *E. coli* contamination. Number in parenthesis refers to the total number of samples tested.
