# Supplementary material
Source: PubMed Central journal article supplement (PMC4516910)
Supplement: Supp_Table3.pdf [file Supp_Table3.pdf]

SUPPLEMENTARY TABLE S3. *ESCHERICHIA COLI* CONTAMINATION OF FOOD PRODUCTS BY SITE OF COLLECTION

| <i>Food product</i> | <i>Store 1</i> |          | <i>Store 2</i> |          | <i>Store 3</i> |          | <i>Store 4</i> |          | <i>Total</i> <sup>a</sup> |          |
|---------------------|----------------|----------|----------------|----------|----------------|----------|----------------|----------|---------------------------|----------|
|                     | <i>No.</i>     | <i>%</i> | <i>No.</i>     | <i>%</i> | <i>No.</i>     | <i>%</i> | <i>No.</i>     | <i>%</i> | <i>No.</i>                | <i>%</i> |
| Cheese              | 18 (19)        | 94.7     | 19 (19)        | 100      | 18 (19)        | 94.7     | 18 (19)        | 94.7     | 73 (76)                   | 96.1     |
| Pasteurized milk    | 1 (19)         | 5.3      | 0 (19)         | 0        | 3 (19)         | 15.8     | 1 (19)         | 5.3      | 5 (76)                    | 6.6      |
| Unpasteurized juice | 5 (19)         | 26.3     | 4 (19)         | 21.0     | 4 (19)         | 21.1     | 8 (19)         | 42.1     | 21 (76)                   | 27.6     |
| Ground beef         | 19 (19)        | 100      | 19 (19)        | 100      | 19 (19)        | 100      | 19 (19)        | 100      | 76 (76)                   | 100      |
| Vegetable           | 9 (19)         | 47.4     | 6 (19)         | 31.6     | 4 (19)         | 21.1     | 7 (19)         | 36.8     | 26 (76)                   | 34.2     |
| Total               | 52 (95)        | 54.7     | 48 (95)        | 50.5     | 48 (95)        | 50.5     | 53 (95)        | 55.8     | 201 (380)                 | 52.9     |

<sup>a</sup>The difference in the number of contaminated samples among different stores was not statistically significant.

No.: Number of samples positive for *E. coli* contamination. Number in parenthesis refers to the total number of samples tested.
